## RESEARCH ARTICLE

## Loci associated with conception rate in crossbred beef heifers

K. F. Oliver<sup>1</sup>, T. W. Geary<sup>2</sup>, J. N. Kiser<sup>1</sup>, J. M. Galliou<sup>1</sup>, M. L. Van Emon<sup>3</sup>, C. M. Seabury<sup>4</sup>, T. E. Spencer<sup>5</sup>, H. L. Neibergs<sup>3\*</sup>

**1** Department of Animal Sciences, Washington State University, Pullman, WA, United States of America, **2** USDA-ARS Fort Keogh LARRL, Miles City, MT, United States of America, **3** Department of Animal and Range Sciences, Montana State University, Bozeman, MT, United States of America, **4** Department of Veterinary Pathobiology, College of Veterinary Medicine, Texas A&M University, TX, United States of America, **5** Division of Animal Sciences, University of Missouri, Columbia, MO, United States of America

\* [neibergs@wsu.edu](mailto:neibergs@wsu.edu)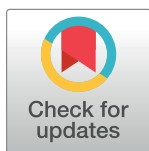

## OPEN ACCESS

**Citation:** Oliver KF, Geary TW, Kiser JN, Galliou JM, Van Emon ML, Seabury CM, et al. (2020) Loci associated with conception rate in crossbred beef heifers. PLoS ONE 15(4): e0230422. <https://doi.org/10.1371/journal.pone.0230422>

**Editor:** Raluca Mateescu, University of Florida, UNITED STATES

**Received:** October 15, 2019

**Accepted:** March 1, 2020

**Published:** April 9, 2020

**Copyright:** This is an open access article, free of all copyright, and may be freely reproduced, distributed, transmitted, modified, built upon, or otherwise used by anyone for any lawful purpose. The work is made available under the [Creative Commons CC0](https://creativecommons.org/licenses/by/4.0/) public domain dedication.

**Data Availability Statement:** Genotyping files are available from the AnimalQTL database (<https://www.animalgenome.org/QTLdb/supp/?t=XwAs6V6MhD>).

**Funding:** This project was supported by the Agriculture and Food Research Initiative competitive grant no. 2018-67015-27577 of the USDA National Institute of Food and Agriculture.

**Competing interests:** The authors have declared that no competing interests exist.

## Abstract

The inability of beef cattle to maintain full term pregnancies has become an economic concern for the beef industry. Herd management and nutritional improvements have alleviated environmental impacts on embryonic and fetal loss, yet additional gains can be made through genomic selection. The objectives of this study were to identify loci and gene-sets in crossbred beef heifers associated with the number of services required to become pregnant (TBRD) and heifer conception rate at first service (HCR1). Heifers ( $n = 709$ ) from a commercial beef operation underwent one round of artificial insemination, before exposure to bulls for natural service for 50 days. Pregnancy and time of conception was determined by ultrasound 35 days after the breeding season. Heifers were genotyped using the GeneSeek (Lincoln, NE) Bovine GGP50K BeadChip prior to genome-wide association analyses (GWAA) conducted using an EIGENSTRAT-like model to identify loci associated ( $P < 1 \times 10^{-5}$ ) with TBRD and HCR1. One locus was associated ( $P = 8.97 \times 10^{-6}$ ) with TBRD on BTA19 and included the positional candidate gene *ASIC2*, which is differentially expressed in the endometrium of fertility classified heifers, and the positional candidate gene, *SPACA3*. Gene-set enrichment analyses using SNP (GSEA-SNP) data, was performed and identified one gene-set, oxidoreductase activity, acting on paired donors, with incorporation or reduction of molecular oxygen as enriched ( $NES = 3.15$ ) with TBRD and contained nine leading edge genes that contributed to the enrichment of the gene set. The enriched gene-set is involved in catalyzing oxidation-reduction reactions, which have been associated with oxidative stressors impacting pregnancy success. No loci were associated nor gene-sets enriched with HCR1. Identification of loci, positional candidate genes, gene-sets and leading edge genes enriched for fertility facilitate genomic selection that allows producers to select for reproductively superior cattle, reduce costs associated with infertility, and increase percent calf crop.

## Introduction

Reproductive efficiency is a critical component for the longevity of beef cattle production [1]. Even though fertilization rates are over 90% [2,3] previous findings estimated that only 60% of fertilized oocytes reached full term [4,5]. Failure of cows and heifers to maintain pregnancy is a substantial loss to producers and accounts for most of the reproductive costs incurred [6]. By reducing infertility by 5%, the beef industry would save over \$90 million annually [7,8].

In the beef industry, the use of fertility measures for EPD is limited to traits with open-ended breeding season lengths [9,10]. Using traditional EPD for selection of complex traits, such as fertility, is difficult as they often display lower heritability and prolonged or late-in life trait expression [11,12]. Genomic selection improves selection accuracy and therefore is particularly useful in complex traits with lower heritability or traits that occur late-in life. Genome-wide association analysis (GWAA) and gene-set enrichment analysis using SNP (GSEA-SNP) data are often used to identify associations of genetic variants with traits for genomic selection [11,13]. Thus, the objectives of this study were to identify loci, gene-sets and leading edge genes associated with the number of services required to become pregnant (TBRD) and heifer conception rate at first service (HCR1) in commercial crossbred beef heifers.

## Materials and methods

The protocol for this study was in accordance with the USDA-ARS Fort Keogh Animal Care and Use Committee (USDA-ARS approval No. 040418–1) and a memo of understanding with Washington State University's Animal Care and Use Committee.

## Study population

The study population consisted of 709 Angus-Salers heifers from a commercial beef cattle ranch located in Montana. Breed percentages for this herd were approximately one-quarter to three-eighths Salers and three-fourths to five-eighths Angus. Heifers were approximately 14 months of age and weighed approximately 350 kg (~60% of mature body weight) at time of first service. Estrus was synchronized in heifers with melengestrol acetate (0.5 mg MGA/hd/d in feed; Pfizer, New York, NY) for 14 days, and an injection of prostaglandin (5 ml Lutalyse; Pfizer, New York, NY) administered 19 days after the last day of MGA feeding. At observed estrus, heifers were bred by AI (day 0) to the same Angus bull. The heifers were then split between two pastures located in Hobson, MT ( $n = 388$ ) and Melstone, MT ( $n = 321$ ) with two and three year old bulls (added 10 days after AI) for 50 days with a bull to heifer ratio of 1:40. A t-test determined pasture location was not significant for TBRD ( $P = 0.28$ ) or HCR1 ( $P = 0.25$ ). Ultrasound was used to determine pregnancy and age embryos approximately 35 days after the conclusion of the breeding season.

Prior to genotyping, heifers were removed if they had any health issues or discrepancies with identification tags. Of the remaining 676 heifers, 300 were selected for genotyping and included 95 that conceived from the first service (AI), 94 that conceived from the second service (approximately day 20), 50 that conceived from the third service (approximately day 40), and 61 heifers that never conceived. Due to the limited number of heifers that conceived from the third service and those that never conceived, all individuals for these groups were genotyped, whereas the heifers from the first and second services were chosen randomly for genotyping.

## Phenotypes

The TBRD analysis compared 95 heifers pregnant to the first service, 94 heifers pregnant to the second service and 50 pregnant to the third service. The 61 heifers that never conceived were excluded from this analysis. The HCR1 analysis compared 95 heifers that were pregnant to the first service to 205 heifers that did not conceive to the first service, which included heifers that did not conceive during the breeding season. Understanding how TBRD and HCR1 are associated with loci regulating pregnancy will provide a better understanding of the complex mechanisms involved in pregnancy success.

## DNA extraction and genotyping

Whole blood (~8 ml) was collected via tail venipuncture into EDTA tubes. White blood cells were isolated and DNA extracted using the Puregene DNA extraction kit (Gentra, Minneapolis, MN) as per manufacturer's instructions. DNA was quantified and quality assessed using the Nanodrop 1000 spectrophotometer (Thermo Fisher Scientific, Wilmington, DE). Samples were genotyped using the GeneSeek Bovine GGP50K BeadChip (Lincoln, NE). The GGP50 BeadChip contains 47,843 SNP with a SNP genotype occurring an average of every 59 kb [14].

## Quality control

Quality control filtering removed SNP with a call rate of < 90% (1,542 SNP removed), a minor allele frequency < 0.01% (1,859 SNP removed), and SNP that failed Hardy-Weinberg equilibrium ( $P < 1 \times 10^{-50}$ , 4 SNP removed), leaving 44,419 SNP for the analysis. Quality control filtering for heifers removed individuals with less than 90% of their genotypes called (10 heifers removed), duplicate animals (2 heifers removed), and heifers with genetic and anatomical sex discrepancies (3 heifers removed). This resulted in 228 heifers remaining for TBRD (89 pregnant to the first service, 93 pregnant to the second service, and 46 pregnant to the third service) and 285 heifers remaining for HCR1 (the same heifers as in TBRD with the addition of 57 heifers that did not conceive).

## Genome-wide association analysis

A GWAA was conducted for TBRD and HCR1 using an approach similar to EIGENSTRAT [15], that corrects for population stratification using principal components analysis (PCA), in the SNP and Variation Suite (SVS) software v 8.1 [16]. The first 10 principal components were used for the analyses. After PCA correction, a linear regression analysis using an additive model was conducted in SVS. The genomic inflation factors ( $\lambda_{GC}$ ) were near or at one ( $\lambda_{GC} = 1.02$  for TBRD and  $\lambda_{GC} = 1.00$  for HCR1).

The significance threshold for an association was based on the Wellcome Trust Case Control Consortium recommendation for unadjusted  $P$  values, where  $P$  values between  $1 \times 10^{-5}$  and  $5 \times 10^{-7}$  indicated a moderate association and unadjusted  $P < 1 \times 10^{-7}$  provided evidence for a strong association [17]. Positional candidate genes were identified within a 28.4 kb region (14.2 kb upstream and 14.2 kb downstream) surrounding the associated SNP based on the average haplotype block size of crossbred beef cattle using the method previously described by Gabriel and coworkers (2002) [18].

## Gene-set enrichment analysis-single nucleotide polymorphism

The GSEA-SNP analysis was computed with the GenGen software package (Holden et al., 2008). SNP were mapped to corresponding genes based on the UMD 3.1 assembly ([ftp://ftp.cbc.umd.edu/pub/data/Bos\\_taurus/](ftp://ftp.cbc.umd.edu/pub/data/Bos_taurus/)). The most significant SNP located within a gene or

within a haplotype block size of 14.2 kb was used for the gene proxy for 19,723 genes as described previously by Neupane and coworkers (2017) [19]. Briefly, the SNP used as gene proxies were ranked and ordered by their significance and then enrichment scores (ES) were computed based on the presence or absence of each gene in the gene-set present. The ES statistics were calculated similarly to the weighted Kolmogorov-Smirnov-like statistic [20]. Gene-sets were taken from Gene Ontology (GO), Reactome, Kyoto Encyclopedia of Genes and Genomes (KEGG), Biocarta, and Protein Analysis Through Evolutionary Relationships (PANTHER). Genes that positively contributed to the peak ES of the gene-set, are leading edge genes and were identified as associated with either TBRD or HCR1. The permuted  $P$  value for each gene set was calculated using GenABEL in R with 10,000 phenotype-based permutations [21]. Enrichment scores were normalized (normalized enrichment scores;  $NES$ ) to account for variances in the number of genes for each gene-set. For this study, a gene-set was considered enriched if the  $NES > 3.0$ .

## Results

### Genome-wide association analysis

One locus was moderately associated ( $P = 8.97 \times 10^{-6}$ ) with TBRD on BTA19 (Fig 1A; Table 1). Two positional candidate genes were associated with this locus. The associated SNP (*rs110962436*) was located 626 bp downstream of the acid sensing ion channel subunit 2 (*ASIC2*) gene and approximately 10 kb from the sperm acrosome associated 3 (*SPACA3*) gene. No loci were associated with HCR1 (Fig 1B), although two loci trended toward an association, one on BTA29 (*rs134906513*,  $P = 3.01 \times 10^{-5}$ ) and one on BTA19 (*rs110962436*,  $P = 6.87 \times 10^{-5}$ ), which was the locus identified as associated with TBRD.

### Gene-set enrichment analysis-single nucleotide polymorphism

The GSEA-SNP identified one gene-set (oxidoreductase activity acting on paired donors with incorporation or reduction of molecular oxygen, GO: 0016705) that was enriched ( $NES = 3.15$ ) for TBRD. This gene set included 34 genes with nine leading edge genes associated with TBRD (Table 1). No gene-sets were enriched for HCR1.

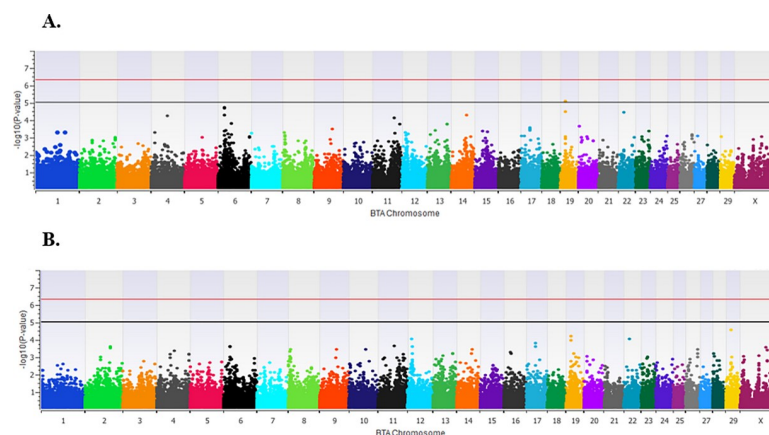

**Fig 1. Manhattan plots of loci associated with fertility in a genome-wide association analysis using an approach similar to EIGENSTRAT.** Panel A identified the locus associated with the number of services required to successfully conceive and maintain pregnancy (TBRD), and heifer conception rate at first service (HCR1) was identified in Panel B. SNP located between the black and red lines provide evidence of a moderate association ( $P < 1 \times 10^{-5}$ ) with TBRD.

<https://doi.org/10.1371/journal.pone.0230422.g001>

**Table 1. Loci, gene-sets, and leading edge genes associated with the number of services required to successfully conceive and maintain pregnancy (TBRD) for 300 crossbred Angus/Salers heifers.**

| Association Test | BTA /Gene Set <sup>1</sup> | Significance <sup>2</sup> | Positional Candidate Genes/Leading Edge Genes <sup>3</sup>           |
|------------------|----------------------------|---------------------------|----------------------------------------------------------------------|
| GWAA             | 19(17)                     | $8.97 \times 10^{-06}$    | <i>ASIC2, SPACA3</i>                                                 |
| GSEA-SNP         | GO: 0016705                | <i>NES</i> = 3.15         | <i>MICAL2, PAH, PTGS1, CYP2D14, PHYH, DBH, P4HA3, CYP19A1, HMOX1</i> |

<sup>1</sup>*Bos taurus* (BTA) chromosome location of the loci associated with fertility followed by the location of the associated SNP in megabases (Mb) in parentheses for GWAA; for GSEA-SNP the enriched gene set was from Gene Ontology (GO).

<sup>2</sup>The significance ( $P < 1 \times 10^{-5}$ ) was taken from the Wellcome Trust Case Control Consortium, 2007 for uncorrected *P* values for the GWAA; for the GSEA-SNP significance was determined by a normalized enrichment score (*NES* > 3.0)

<sup>3</sup>Positional candidate genes were defined as genes located within 28.4 kb of the associated SNP(s) and leading edge genes were the genes positively influencing the enrichment scores for the gene set. Gene locations were based on UMD 3.1.

<https://doi.org/10.1371/journal.pone.0230422.t001>

## Discussion

That there were no loci associated with HCR1 may have been confounded by the pubertal status of the heifers prior to administration of MGA. As heifers were not tested to identify if they were cycling prior to administration of MGA, it is possible that their first estrus was at the time of breeding. Heifers bred to their first estrus or less likely to conceive than heifers who have had a previous estrous cycle [22]. If heifers had all been bred after at least one estrous cycle, it is possible that an association with HCR1 would have been identified.

The locus associated with TBRD was near *ASIC2*. Mutations of *ASIC2* lead to cellular death and cause changes to the inactivation process of pH dependent channels [23,24]. In the oviduct, expression of *ASIC2* is localized to the ciliated cells when an acidic state occurs [25]. Acidic environments usually indicate an abnormal condition such as inflammation [25]. Inflammation of the female reproductive tract is negatively correlated with pregnancy success. Differential expression of *ASIC2* occurred in the endometrium between fertility classified heifers, supporting the idea that *ASIC2* has functions that may be associated with pregnancy success [26].

The second positional candidate gene associated with TBRD is *SPACA3*, which encodes sperm protein reactive with anti-sperm antibody (SPRASA) involved in sperm adhesion to the egg, fertilization, and embryonic development in females [27]. Inhibition of SPRASA antiserum interrupted embryonic development at the morula stage [27], which would be detrimental in the successful establishment and maintenance of pregnancy in heifers.

The gene-set enriched for TBRD, oxidoreductase activity acting on paired donors with incorporation or reduction of molecular oxygen (GO: 0016705), is involved in catalysis of oxidation-reduction reactions [28, 29], which can contribute to oxidative stressed environments. Pregnancy is a state of oxidative stress [30] as placental mitochondria have increased metabolic activity and reduced scavenging power of antioxidants [31]. In humans, early pregnancy oxidative stress is due to the intrauterine environment being low in oxygen [32], placing the placenta and fetus in a hypoxic environment [31]. This hypoxic environment is crucial in controlling oxygen homeostasis and is an essential factor for early embryonic and placental development [33] in sheep [34], humans [35], and mice [36]. Additionally, reactive oxygen species have key roles in apoptosis during early embryonic development [37, 38], maintaining homeostasis within the uterine endometrium for implantation [39–43], and may be initiated either intrinsically by the mitochondrial pathway or extrinsically through membrane-associated death receptors [38]. Adverse pregnancy outcomes associated with increased levels of reactive oxygen species have been linked with reproductive inefficiencies such as spontaneous abortion, intrauterine growth restriction and unexplained infertility [38, 44–45].

The nine leading edge genes (Table 1) in GO: 0016705 had various roles ranging from cell proliferation (*MICAL2*) [46] to encoding enzymes for proper peroxisome function (*PYPH*) [47]. Four leading edge genes influence the ovarian (*DBH*, *MICAL2*, *CYP19A1*) and uterine environments (*PTGS1*), while one (*HMOX1*) is involved in the immune response (Table 1). The leading edge gene *DBH* is thought to be associated with oxidative stress in the follicle [48–51] while *HMOX1* encodes for HO-1, a unique regulator involved in prevention of tissue injury and modulates both innate and adaptive immune response [52, 53]. Three (*PHYH*, *MICAL2*, *HMOX1*) of the nine leading edge genes are differentially expressed in the endometrium (*MICAL2*, *HMOX1*) and conceptus (*PHYH*) of fertility classified crossbred beef heifers [26]. This supports the case that these genes have underlying influences on pregnancy establishment within the uterine environment.

## Conclusion

This study improves understanding of the loci associated with fertility in crossbred beef heifers and the genes that may play a role in successful establishment of pregnancy. One positional candidate gene (*ASIC2*) and three of the leading edge genes (*PHYH*, *MICAL2*, *HMOX1*) identified are supported in their fertility role by their differential expression in fertility-classified heifers. Similarly, the positional candidate genes, *ASIC2* and *SPACA3*, associated with TBRD, have functional relevance to the establishment of a successful pregnancy in the first weeks of gestation. These results provide preliminary information that may enhance use of genomic selection in the beef industry to better select for reproductively superior heifers and improve our understanding of factors contributing to embryonic losses.

## Acknowledgments

The authors would like to acknowledge the Montana beef producers for their use of heifers and assistance in phenotype collection.

## Author Contributions

**Conceptualization:** T. E. Spencer, H. L. Neibergs.

**Data curation:** K. F. Oliver, T. W. Geary, J. N. Kiser, J. M. Galliou, M. L. Van Emon.

**Formal analysis:** K. F. Oliver, C. M. Seabury.

**Funding acquisition:** H. L. Neibergs.

**Investigation:** T. E. Spencer, H. L. Neibergs.

**Methodology:** T. W. Geary, J. N. Kiser, C. M. Seabury, H. L. Neibergs.

**Project administration:** H. L. Neibergs.

**Supervision:** J. N. Kiser, H. L. Neibergs.

**Writing – original draft:** K. F. Oliver.

**Writing – review & editing:** T. W. Geary, J. N. Kiser, J. M. Galliou, M. L. Van Emon, C. M. Seabury, H. L. Neibergs.

## References

1. McDanel T. G., Kuehn L.A., Thomas M.G, Snelling W.M., Smith T. P. L., Pollak E.J., et al. 2014. Genomewide association study of reproductive efficiency in female cattle. *J. Anim. Sci.* 92:1945–1957. <https://doi.org/10.2527/jas.2012-6807> PMID: 24782394

2. Diskin M. G., and Sreenan J. M. 1980. Fertilization and embryonic mortality rates in beef heifers after artificial insemination. *J. Reprod. Fertil.* 59: 463–468. <https://doi.org/10.1530/jrf.0.0590463> PMID: 7431304
3. Atkins J. A., Smith M. F., MacNeil M. D., Jinks E. M., Abreu R. M., Alexander L. J., et al. 2013. Pregnancy establishment and maintenance in cattle. *J. Anim. Sci.* 91: 722–733. <https://doi.org/10.2527/jas.2012-5368> PMID: 23148248
4. Diskin M. G., Murphy J. J., and Sreenan J. M. 2006. Embryo survival in dairy cows managed under pastoral conditions. *Anim. Reprod. Sci.* 96:297–311. <https://doi.org/10.1016/j.anireprosci.2006.08.008> PMID: 16963203
5. Diskin M. G. and Morris D. G. Embryonic and early foetal losses in cattle and other ruminants. *Reprod. Domest. Anim.* 2008; 43(Suppl 2):260–267.
6. Bellows D. S., Ott S. L., and Bellows R. A. 2002. Review: Cost of reproductive diseases and conditions in cattle. *The Professional Animal Scientist.* 18: 26–32. [https://doi.org/10.15232/S1080-7446\(15\)31480-7](https://doi.org/10.15232/S1080-7446(15)31480-7).
7. Humbolt P. 2001. Use of pregnancy specific proteins and progesterone assays to monitor pregnancy and determine the timing, frequencies and sources of embryonic mortality. *Theriogenology.* 56: 1417–1433. [https://doi.org/10.1016/s0093-691x\(01\)00644-6](https://doi.org/10.1016/s0093-691x(01)00644-6) PMID: 11768808
8. Santos J. E. P., Thatcher W.W., Chebel R. C., Cerri R. L. A., and Galvão K. N. 2004. The effect of embryonic death rates in cattle on the efficacy of estrus synchronization programs. *Anim. Reprod. Sci.* 82–83: 513–535. <https://doi.org/10.1016/j.anireprosci.2004.04.015>.
9. Glaze B. J. Jr. 2011. Genetic selection for fertility and performance. Available at: [https://beefrepro.unl.edu/proceedings/2011northwest/13\\_nw\\_geneticselection\\_glaze.pdf](https://beefrepro.unl.edu/proceedings/2011northwest/13_nw_geneticselection_glaze.pdf). (Accessed 1 August 2018.)
10. American Angus Association. EPD and \$Value definitions. 2018. Available at <https://www.angus.org/NCE/Definitions.aspx>. (Accessed 1 August 2018.)
11. Van Eenennaam A. L. and Drake D.J. 2011. Where in the beef-cattle supply chain might DNA tests generate value? *Anim. Prod. Sci.* 52:185–196. <https://doi.org/10.1071/AN11060>
12. Akanno E. C., Plastow G., Fitzsimmons C., Miller S. P., Baron V., Ominski K., et al. 2015. Genome-wide association for heifer reproduction and calf performance traits in beef cattle. *Genome.* 58: 549–557. <https://doi.org/10.1139/gen-2015-0031> PMID: 26484575
13. Patnala R., Clements J., and Batra J. 2013. Candidate gene association studies: a comprehensive guide to useful *in silico* tools. *BMC Genetics.* 14: 39. <https://doi.org/10.1186/1471-2156-14-39> PMID: 23656885
14. Neogen. GGP Bovine 50K. In GeneSeek Genomic Profiler Bovine 50K, Neogen, Inc 2016. [https://genomics.neogen.com/pdf/ag311\\_ggp\\_bovine50k\\_brochure.pdf](https://genomics.neogen.com/pdf/ag311_ggp_bovine50k_brochure.pdf). (Accessed 10 May 2019.)
15. Price A. L., Patterson N. J., Plenge R. M., Wienblatt M. E., Shadick N. A., and Reich D. 2006. Principal components analysis corrects for stratification in genome-wide association studies. *Nat. Genet.* 38: 904–909. <https://doi.org/10.1038/ng1847> PMID: 16862161
16. SNP & Variation Suite (Version 8.1) [SVS]. Bozeman MT: Golden Helix, Inc. Available from <http://www.goldenhelix.com>.
17. Wellcome Trust Case Control Consortium Genome-wide association study of 14,000 cases of seven common diseases and 3,000 shared controls. 2007. *Nature.* 447:661–678. <https://doi.org/10.1038/nature05911> PMID: 17554300
18. Gabriel S. B., Schaffner S. F., Nquyen H., Moore J. M., Roy J., Blumenstiel B., Higgins J., et al. 2002. The structure of haplotype blocks in the human genome. *Science.* 296: 2225–2229. <https://doi.org/10.1126/science.1069424> PMID: 12029063
19. Neupane M., Geary T.W., Kiser J.N., Burns G.W., Hansen P.J., Spencer T.E., et al. 2017. Loci and pathways associated with uterine capacity for pregnancy and fertility in beef cattle. *PLoS ONE.* 12(12): e0188997. <https://doi.org/10.1371/journal.pone.0188997> PMID: 29228019
20. Holden M., Deng S., Wojnowski L., and Kulle B. 2008. GSEA-SNP: Applying gene set enrichment analysis to SNP data from genome-wide association studies. *Bioinformatics.* 24: 2784–2785. <https://doi.org/10.1093/bioinformatics/btn516> PMID: 18854360
21. Aulchenko Y. S., Ripke S., Isaacs A., and van Duijn C. M. 2007. GenABEL: an R library for genome-wide association analysis. *Bioinformatics.* 23:1294–1296. <https://doi.org/10.1093/bioinformatics/btm108> PMID: 17384015
22. Byerley D.J., Staigmiller R. B., Berardinelli J. G., and Short R. E. 1987. Pregnancy rates of beef heifers bred either on puberal or third estrus. *J. Anim. Sci.* 65(3):645–50. <https://doi.org/10.2527/jas1987.653645x> PMID: 3667429
23. Waldmann R., Champigny G., Voilley N., Lauritzen I., and Lazdunski M. 1996. The mammalian degenerin MDEG, an amiloride-sensitive cation channel activated by mutations causing neurodegeneration in

- Caenorhabditis elegans*. J. Biol. Chem. 271:10433–10436. <https://doi.org/10.1074/jbc.271.18.10433> PMID: 8631835
24. Adams C. M., Anderson M. G., Motto D. G., Price M. P., Johnson W. A., and Welsh M. J. 1998. Ripped pocket and pickpocket, novel *Drosophila* DEG/ENaC subunits expressed in early development and in mechanosensory neurons. J. Cell. Biol. 140: 143–152. <https://doi.org/10.1083/jcb.140.1.143> PMID: 9425162
  25. Kikuchi S., Ninomiya T., Kawamata T., and Tatsumi H. 2008. Expression of ASIC2 in ciliated cells and stereociliated cells. Cell Tissue Res. 333: 217. <https://doi.org/10.1007/s00441-008-0635-3> PMID: 18560896
  26. Moraes J. G. N., Behura S. K., Geary T. W., Hansen P. J., Neibergs H. L., and Spencer T. E. 2018. Uterine influences on conceptus development in fertility-classified animals. Proc. Natl. Acad. Sci. U.S.A. 115: E1749–E1758. <https://doi.org/10.1073/pnas.1721191115> PMID: 29432175
  27. Wagner A., Holland O. J., Tong M., Shelling A. N., and Chamley L. W. 2015. The role of SPRASA in female fertility. Reprod. Sci. 22: 452–461. <https://doi.org/10.1177/1933719114542009> PMID: 25038051
  28. Ashburner M., Ball C. A., Blake J. A., Botstein D., Butler H., Cherry J. M., et al. 2000. Gene ontology; tool for the unification of biology. Nat. Genet. 25: 25–29. <https://doi.org/10.1038/75556> PMID: 10802651
  29. The Gene Ontology Consortium. 2019. The Gene Ontology Resource: 20 years and still GOing strong. Nucleic Acids Res. 47(D1):D330–D338. <https://doi.org/10.1093/nar/gky1055> PMID: 30395331
  30. Wisdom S. J., Wilson R., McKillop J. H., and Walker J. J. 1991. Antioxidant systems in normal pregnancy and in pregnancy-induced hypertension. Am. J. Obstet. Gynecol. 126: 1701–1704. [https://doi.org/10.1016/0002-9378\(91\)90018-M](https://doi.org/10.1016/0002-9378(91)90018-M).
  31. Myatt L., and Cui X. 2004. Oxidative stress in the placenta. Histochem. Cell Biol. 122: 369–382. <https://doi.org/10.1007/s00418-004-0677-x> PMID: 15248072
  32. Jauniaux E., Watson A. L., Hempstock J., Bao Y. P., Skepper J. N., and Burton G. J. 2000. Onset of maternal arterial blood flow and placental oxidative stress. A possible factor in human early pregnancy failure. Am. J. Pathol. 157: 2111–2122. [https://doi.org/10.1016/S0002-9440\(10\)64849-3](https://doi.org/10.1016/S0002-9440(10)64849-3) PMID: 11106583
  33. Dunwoodie S. L. 2009. The role of hypoxia in development of the mammalian embryo. Develop. Cell. 17: 755–773. <https://doi.org/10.1016/j.devcel.2009.11.008>.
  34. Nau P. N., Van Natta T., Ralphe J. C., Teneyck C. J., Bedell K. A., Caldarone C. A., et al. 2002. Metabolic adaptation of the fetal and postnatal ovine heart: regulatory role of hypoxia-inducible factors and nuclear respiratory factor-1. Pediatr. Res. 52: 269–278. <https://doi.org/10.1203/00006450-200208000-00021> PMID: 12149506
  35. De Marco C. S. and Caniggia I. 2002. Mechanisms of oxygen sensing in human trophoblasts cells. Placenta. 23(Suppl. A): S58–S68. <https://doi.org/10.1053/plac.2002.0809> PMID: 11978060
  36. Daikoku T., Matsumoto H., Grupta R. A., Das S. K., Gassmann M., DuBois R. N., and Dey S. K. 2003. Expression of hypoxia-inducible factors in the peri-implantation mouse uterus is regulated in a cell-specific and ovarian steroid hormone-dependent manner. Evidence for differential function of HIFs during early pregnancy. J. Biol. Chem. 278: 7683–7691. <https://doi.org/10.1074/jbc.M211390200> PMID: 12482866
  37. Pierce G.B., Lewellyn A. L., and Parchment R. E. 1989. Mechanism of programmed cell death in the blastocyst. Proc. Natl. Acad. Sci. U.S.A. 86: 3654–3658. <https://doi.org/10.1073/pnas.86.10.3654> PMID: 2726743
  38. Al-Gubory K. H., Fowler P. A., and Garrel C. 2010. The roles of cellular reactive species, oxidative stress and antioxidants in pregnancy outcomes. Inter. J. Biochem. Cell Biol. 42: 1634–1650. <https://doi.org/10.1016/j.biocel.2010.06.001>.
  39. von Rango U., Classen-Linke I., Krusche C. A., and Beier H. M. 1998. The receptive endometrium is characterized by apoptosis in the glands. Hum. Reprod. 13: 3177–3189. <https://doi.org/10.1093/humrep/13.11.3177> PMID: 9853878
  40. Pampfer S., and Donnay I. 1999. Apoptosis at the time of embryo implantation in mouse and rat. Cell Death Differ. 6: 533–545. <https://doi.org/10.1038/sj.cdd.4400516> PMID: 10381643
  41. Tassell W., Slater M., Barden J. A., and Murphy C. R. 2000. Endometrial cell death during early pregnancy in the rat. Histochem. J. 32: 373–379. <https://doi.org/10.1023/a:1004069731540> PMID: 10943852
  42. Fei G., Peng W., Xin-Lei C., Zhao-Yuan H., and Yi-Xun L. 2001. Apoptosis occurs in implantation site of the rhesus monkey during early stage of pregnancy. Contraception. 64: 193–200. [https://doi.org/10.1016/s0010-7824\(01\)00241-4](https://doi.org/10.1016/s0010-7824(01)00241-4) PMID: 11704100



43. Zhang Q., and Paria B. C. 2006. Importance of uterine cell death, renewal, and their hormonal regulation in hamsters that show progesterone-dependent implantation. *Endocrinology*. 147: 2215–2227. <https://doi.org/10.1210/en.2005-1555> PMID: 16469810
44. Gupta S., Agarwal A., Banerjee J., and Alvarez J. G. 2007. The role of oxidative stress in spontaneous abortion and recurrent pregnancy loss: a systematic review. *Obstet. Gynecol. Surv.* 62: 335–347. <https://doi.org/10.1097/01.ogx.0000261644.89300.df> PMID: 17425812
45. Agarwal A., Aponte-Mellado A., Premkumar B. J., Shaman A., and Gupta S. 2012. The effects of oxidative stress on female reproduction: a review. *Reprod. Biol. Endocrinol.* 10: 49. <https://doi.org/10.1186/1477-7827-10-49> PMID: 22748101
46. Cai Y., Lu J., and Tang F. 2018. Overexpression of *MICAL2*, a novel tumor-promoting factor, accelerates tumor progression through regulating cell proliferation and EMT. *J Cancer*. 9:521–527. <https://doi.org/10.7150/jca.22355> PMID: 29483957
47. National Library of Medicine (US). 2010. PHYH gene (Genetics Home Reference). <https://ghr.nlm.nih.gov/gene/PHYH> (Accessed 31 May 2019.)
48. Ruder E. H., Hartman T. J., Blumberg J., and Goldman M. B. 2008. Oxidative stress and antioxidants: exposure and impact on female fertility. *Hum. Reprod. Update*. 14: 345–357. <https://doi.org/10.1093/humupd/dmn011> PMID: 18535004
49. Bausenwein J., Serke H., Eberle K., Hirrlinger J., Jogschies P., Hmeidan F. A., et al. 2010. Elevated levels of oxidized low-density lipoprotein and of catalase activity in follicular fluid of obese women. *Mol. Hum. Reprod.* 16: 117–124. <https://doi.org/10.1093/molehr/gap078> PMID: 19729414
50. Qiao J., and Feng H. L. 2011. Extra-and intra-ovarian factors in polycystic ovary syndrome: impact on oocyte maturation and embryo developmental competence. *Hum. Reprod. Update*. 17: 17–33. <https://doi.org/10.1093/humupd/dmq032> PMID: 20639519
51. Saller S., Merz-Lange J., Raffael S., Hecht S., Pavlik R., Thaler C., et al. 2012. Norepinephrine, active norepinephrine transporter, and norepinephrine-metabolism are involved in the generation of reactive oxygen species in human ovarian granulosa cells. *Endocrinology*. 153: 1472–1483. <https://doi.org/10.1210/en.2011-1769> PMID: 22234472
52. Duckers H. J., Boehm M., True A. L., Yet S. F., San H., Park J. L., et al. 2001. Heme oxygenase-1 protects against vascular constriction and proliferation. *Nat. Med.* 7: 693–698. <https://doi.org/10.1038/89068> PMID: 11385506
53. Zenclussen M. L., Linzke N., Schumacher A., Fest S., Meyer N., Casalis P. A., et al. 2014. Heme oxygenase-1 is critically involved in placentation, spiral artery remodeling, and blood pressure regulation during murine pregnancy. *Front. Pharmacol.* 5: 291. <https://doi.org/10.3389/fphar.2014.00291> PMID: 25628565
